# Supplementary material
Source: MDPI journal article supplement (https://www.mdpi.com/2227-9040/9/9/266)
Supplement: s1 [file s1]

**Table S1.** Further information about candidate sensors.

| Sensor model | Producer                                                | Sensitivity | Response time (s) | Lifetime (years) | Price ( ¥ ) |
|--------------|---------------------------------------------------------|-------------|-------------------|------------------|-------------|
| TGS813       | Figaro USA, Inc.                                        | 0.55-0.65   | Short*            | Long*            | 39.00       |
| TGS822       |                                                         | 0.3-0.5     | Short             | Long             | 35.00       |
| TGS2600      |                                                         | 0.3-0.6     | Short             | Long             | 14.50       |
| TGS2620      |                                                         | 0.3-0.5     | Short             | Long             | 45.00       |
| TGS832       |                                                         | 0.5-0.65    | Short             | Long             | 249.00      |
| TGS826       |                                                         | 0.4-0.7     | Short             | Long             | 550.00      |
| TGS2610      |                                                         | 0.50-0.62   | Short             | Long             | 30.00       |
| TGS800       |                                                         | 0.5-0.7     | Short             | Long             | 60.00       |
| MQ-3         | Zhengzhou Winsen Electronic Technology Co., Ltd., China | ≥5          | ≤10               | 10               | 3.10        |
| MQ-5         |                                                         | ≥5          | ≤10               | 10               | 2.30        |
| MQ-6         |                                                         | ≥5          | ≤10               | 10               | 2.30        |
| MQ-8         |                                                         | ≥5          | ≤10               | 10               | 2.30        |
| 2M009        | Beijing Guotai Hengan Technology Co., Ltd., China       | > 5         | < 10              | 3-5              | 150.00      |
| 2M012        |                                                         | > 5         | < 10              | 3-5              | 120.00      |
| MQK2         |                                                         | > 5         | < 10              | 3-5              | 50.00       |

\*Figaro's official website does not quantitatively give the response time and life of the TGS series sensors

**Table S2.** The specifications of components in the e-nose system.

| Name                     | Type             | Producer                                                    | Others        |
|--------------------------|------------------|-------------------------------------------------------------|---------------|
| Data Send Port           | CH340G           | Shenzhen Kebi Electronic Technology Co., Ltd., China        | -             |
| Battery                  | QS-3S 12V        | Nanning Hongruixiang Electronic Technology Co., Ltd., China | -             |
| Signal Acquisition PCB   | DoFlye cortex-M3 | Shanghai Langyi Electronic Technology Co., Ltd., China      | -             |
| Reaction Chamber         | Self-designed    | Yuyao Xingke Mould Company, Ningbo, China                   | Material: ABS |
| Intake Pipe              | N/A              | Dongtai Fujun Plastics Business Department, Yancheng, China | -             |
| Drying Tube              | N/A              | Nanjing Liebo Scientific Instrument Co., Ltd., China        | -             |
| Suction Pump             | KVP04-1.1-12V    | Kachuaner Fluid Technology (Shanghai) Co., Ltd., China      | -             |
| Voltage Regulator Module | EV 12V-5V        | Shenzhen Yiwen Technology Co., Ltd., China                  | -             |
